# Supplementary material for: SARS-CoV-2 seroprevalence and mental health of school staff: a cross-sectional study of schools from four areas of Montreal, Quebec in 2021
Source: HighWire-hosted journal article supplement (doi:10.1136/bmjopen-2023-081838), 2024-08-01

**Supplementary: Directed acyclic graphs and minimally sufficient adjustment sets for seroprevalence and mental health outcomes analyses and demographic comparisons between the EnCORE sample and Quebec educators.**

**Supplement Table 1.** Minimally sufficient adjustment sets used in seroprevalence multivariable regressions

| Explanatory Variable                                         | Minimally sufficient adjustment set                                                                              |
|--------------------------------------------------------------|------------------------------------------------------------------------------------------------------------------|
| Age, Sex, Ethnic/Racial minority, Region, Level of education | No adjustment                                                                                                    |
| Student compliance to wearing a mask and distancing          | School level, Region                                                                                             |
| School level                                                 | Education, Household crowding, Household income, Ethnic/racial minority, Sex, Vaccination, Number classes taught |
| Number classes taught at least 25% of the time               | Education, Household crowding, Household income, Ethnic/racial minority, Sex, Vaccination, School level          |
| Household crowding                                           | Age, Household income, Ethnic/racial minority                                                                    |
| Household income                                             | Education, Ethnic/racial minority                                                                                |
| Vaccinated with at least one dose                            | Age, Education, Household income, Ethnic/racial minority                                                         |

**Supplement Table 2.** Minimally sufficient adjustment sets used in mental health multivariable regressions.

| Explanatory Variable                                | Minimally sufficient adjustment set                                                         |
|-----------------------------------------------------|---------------------------------------------------------------------------------------------|
| School level                                        | Sex                                                                                         |
| Student compliance to wearing a mask and distancing | School level                                                                                |
| Fear of COVID infection from school                 | Vaccinated with at least one dose, Age, Student compliance to wearing a mask and distancing |

**Supplement Table 3.** Comparison of the study sample and Quebec educators from the 2021 Canadian census, across age, sex, school level and ethnic/racial minority status

|                        |                   | Quebec 2021 | Study Sample |
|------------------------|-------------------|-------------|--------------|
| Sex                    | Male              | 15%         | 11%          |
| Age                    |                   |             |              |
|                        | <35 years         | 33%         | 20%          |
|                        | 35-44 years       | 28%         | 30%          |
|                        | 45+ years         | 40%         | 49%          |
| School level           |                   |             |              |
|                        | Daycare           | 47%         | 30%          |
|                        | Elementary School | 31%         | 36%          |
|                        | High School       | 22%         | 34%          |
| Ethnic/racial minority |                   | 14%         | 4%           |

**Supplementary Figure 1.** Directed acyclic graph identifying confounders of the association between school level and risk of seropositivity

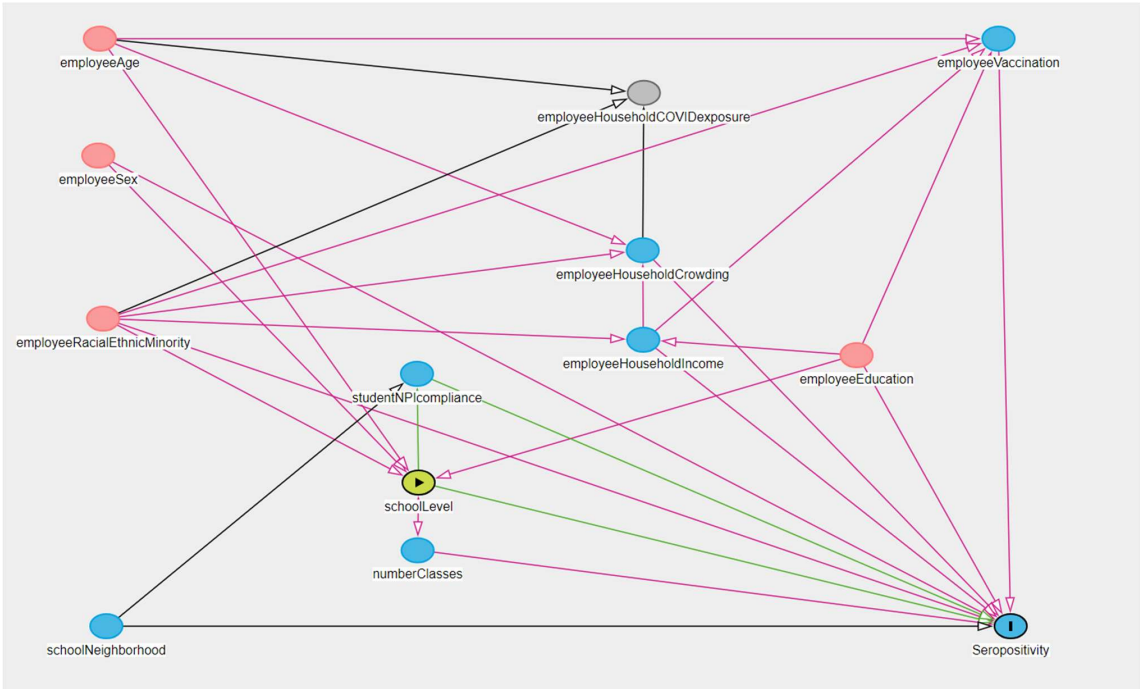

**Supplement Figure 2.** Directed acyclic graph to identify confounders of the association between the fear of becoming infected at work and risk of severe anxiety, moderate or severe depression, burnout or low resilience

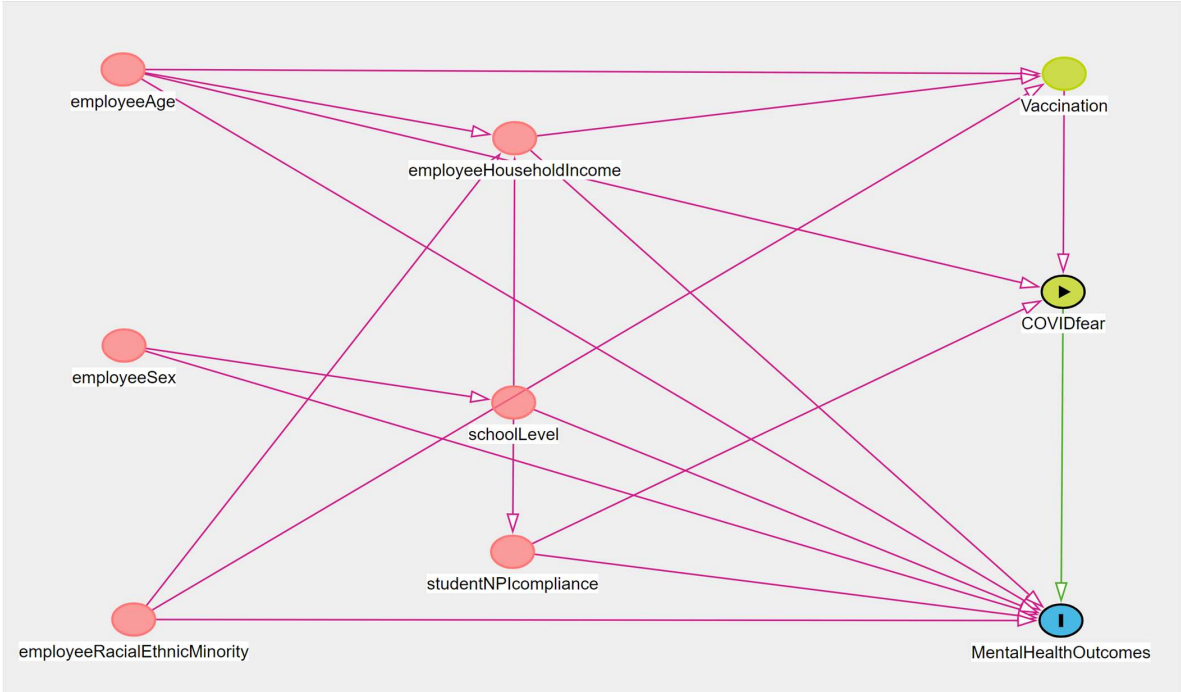

Supplement: bmjopen-2023-081838supp001_data_supplement.pdf [file bmjopen-2023-081838supp001_data_supplement.pdf]
